# Supplementary material
Source: publisher figshare collection journal article supplement (https://acs.figshare.com/ndownloader/files/15593399)
Supplement: Supplementary file 1 [file 15593399]

## **Supporting Information:**

# **Transparent Conductive Printable Meshes Based on Percolation Patterns**

Gurvinder Singh Khinda<sup>a,†</sup>, Matthew Strohmayer<sup>b,†</sup>, Darshana L. Weerawarne<sup>a</sup>, Jack P. Lombardi, III<sup>a</sup>, Natalya Tokranova<sup>b</sup>, James Castracane<sup>b</sup>, Carl A. Ventrice, Jr.<sup>b</sup>, Mark D. Poliks<sup>a,\*</sup>, and Igor A. Levitsky<sup>c,\*</sup>

<sup>a</sup>Systems Science and Industrial Engineering Department, Binghamton University-SUNY,  
4400 Vestal Parkway East, Binghamton, NY 13902

<sup>b</sup>Colleges of Nanoscale Science and Engineering, SUNY Polytechnic Institute, 257 Fuller  
Rd., Albany, NY 12203

<sup>c</sup>Corish, Inc., 150 Harvard St., Fall River, MA 02720

\*Email: mpoliks@binghamton.edu; ilevitsky@corishinc.com

†These authors contributed equally.

**a**

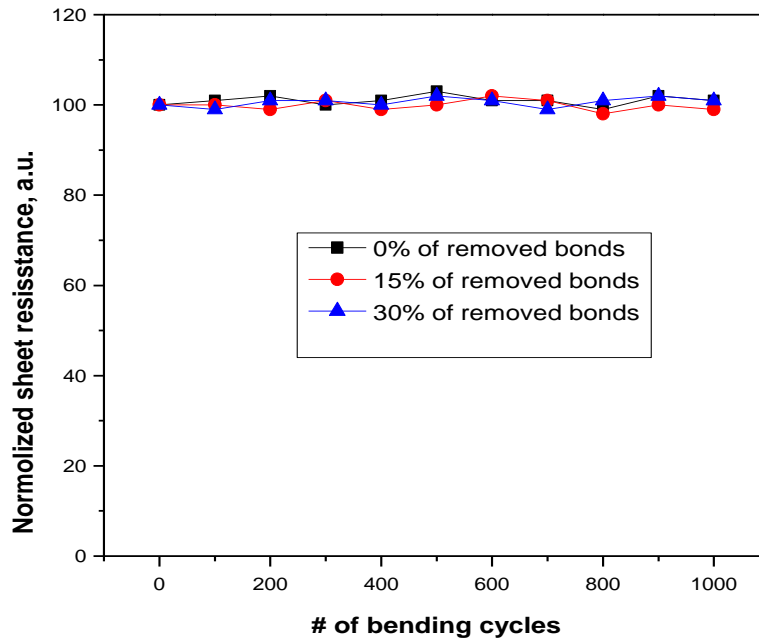

**b**

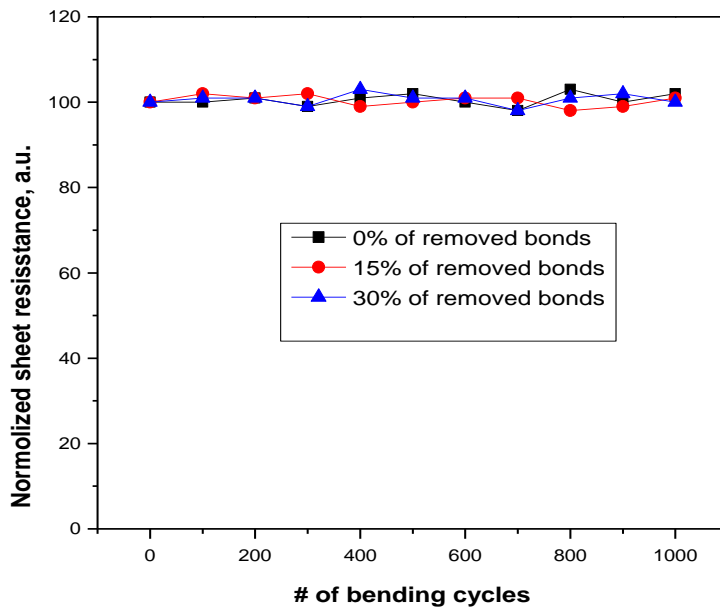

Figure 1S: Dependencies of the sheet resistance on the number of the bending cycles for regular square mesh and percolation meshes with 10 % and 20% of removed bonds. The line width is 60  $\mu\text{m}$  (a) and 120  $\mu\text{m}$  (b).
